# Supplementary material for: An UV-photo and ionic dual responsive interpenetrating network hydrogel with shape memory and self-healing properties
Source: Royal Society of Chemistry journal article supplement (doi:10.1039/d2ra00619g), 2022-01-01
Supplement: d2ra00619g1.pdf [file d2ra00619g1.pdf]

**Supporting information**

**An UV-photo and ionic dual responsive interpenetrating network hydrogel with shape memory and self-healing properties**

Ziyi Li,\* Jiwei Cai, Miaohan Wei, Juncheng Chen

The First Dongguan Affiliated Hospital of Guangdong Medical University, The Second Clinical Medical College, Guangdong Medical University, Dongguan, 523808, China

Corresponding author: E-mail: [liziyi@gdmu.edu.cn](mailto:liziyi@gdmu.edu.cn)

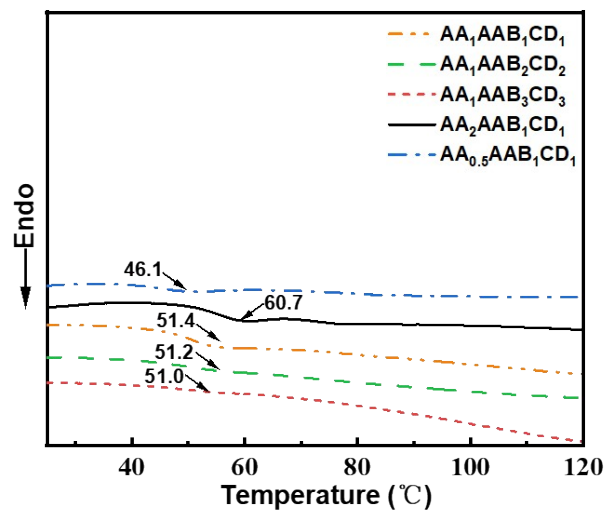

**Fig. S1** The DSC curves of different hydrogels in the second heating process.

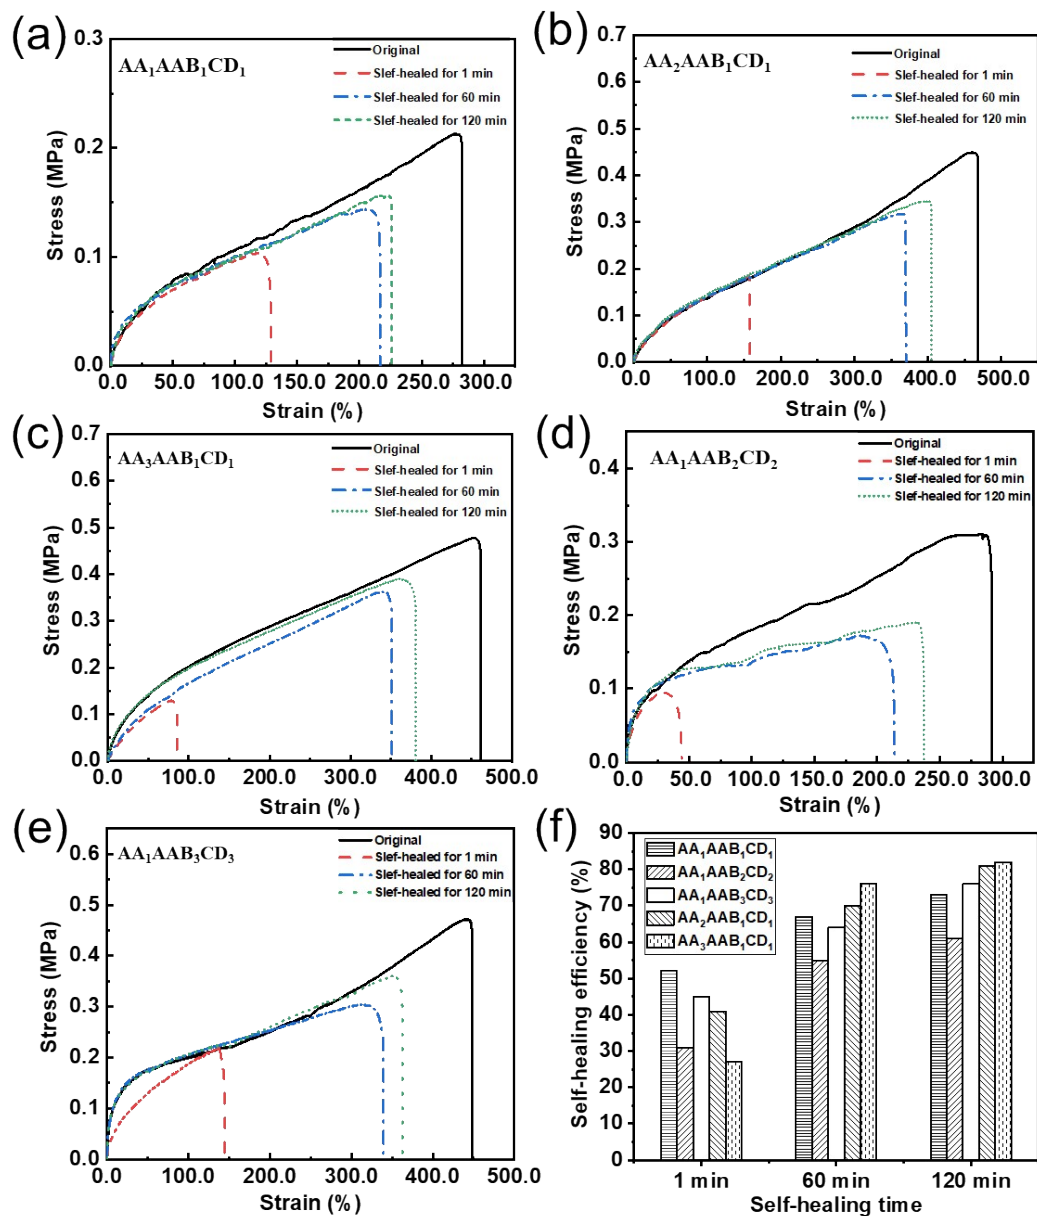

**Fig. S2** The tensile strength and the self-healing efficiency of different hydrogels. The influence of AA content (a-c) and EP-CD (a, d and e) content and self-healing time on tensile strength. (f) The self-healing efficiency of corresponding hydrogel at 1, 60 and 120 min.
